# Supplementary material for: Lanthano phosphomolybdate-decorated silica nanoparticles: novel hybrid materials with photochromic properties
Source: Royal Society of Chemistry journal article supplement (doi:10.1039/c5dt00090d), 2015-01-01
Supplement: c5dt00090d1.pdf [file c5dt00090d1.pdf]

## **Electronic Supplementary Information**

### **Lanthano phosphomolybdate-decorated silica nanoparticles: novel hybrid materials with photochromic properties**

Tânia V. Pinto, Diana M. Fernandes, Clara Pereira, Alexandra Guedes, Ginesa Blanco, Jose M.  
Pintado, Manuel F. R. Pereira and Cristina Freire

**Table S1.** Core-level binding energy (BE) and area of each component for C18-SiO<sub>2</sub>, C18-SiO<sub>2</sub>@PMo<sub>11</sub>, C18-SiO<sub>2</sub>@Sm(PMo<sub>11</sub>)<sub>2</sub> and C18-SiO<sub>2</sub>@Eu(PMo<sub>11</sub>)<sub>2</sub> obtained by curve fitting of XPS spectra

| Material                                                     | C 1s                    |                          | N 1s <sup>c</sup>       |                          | O 1s                    |                          | Si 2p <sub>3/2</sub>    |                          | P 2p <sub>3/2</sub>     |                          | Mo 3d <sub>5/2</sub>    |                          | Ln <sup>III</sup> 3d/4d  |                          |
|--------------------------------------------------------------|-------------------------|--------------------------|-------------------------|--------------------------|-------------------------|--------------------------|-------------------------|--------------------------|-------------------------|--------------------------|-------------------------|--------------------------|--------------------------|--------------------------|
|                                                              | BE <sup>a</sup><br>(eV) | Area <sup>b</sup><br>(%) | BE <sup>a</sup><br>(eV)  | Area <sup>b</sup><br>(%) |
| C18-SiO <sub>2</sub>                                         | 284.6 (1.3)             | 66.0                     | 399.3 (1.5)             | 6.5                      | 532.2 (1.5)             | 95.3                     | 102.7 (1.6)             | 41.2                     |                         |                          |                         |                          |                          |                          |
|                                                              | 285.7 (1.3)             | 23.9                     | 402.1 (1.5)             | 93.5                     | 533.8 (1.5)             | 4.7                      | 104.0 (1.6)             | 25.4                     |                         |                          |                         |                          |                          |                          |
|                                                              | 286.8 (1.3)             | 8.0                      |                         |                          |                         |                          |                         |                          |                         |                          |                         |                          |                          |                          |
|                                                              | 288.5 (1.3)             | 2.1                      |                         |                          |                         |                          |                         |                          |                         |                          |                         |                          |                          |                          |
| C18-SiO <sub>2</sub><br>@PMo <sub>11</sub>                   | 284.6 (1.4)             | 58.3                     | 402.3 (1.8)             | 100.0                    | 530.0 (1.6)             | 8.3                      | 102.7 (1.7)             | 61.0                     | n.d. <sup>d</sup>       |                          | 232.0 (2.6)             | 60.0                     |                          |                          |
|                                                              | 285.8 (1.4)             | 24.9                     |                         |                          | 532.2 (1.6)             | 71.5                     | 104.9 (1.7)             | 5.7                      |                         |                          |                         |                          |                          |                          |
|                                                              | 286.9 (1.4)             | 11.3                     |                         |                          | 533.4 (1.6)             | 16.3                     |                         |                          |                         |                          |                         |                          |                          |                          |
|                                                              | 288.7 (1.4)             | 5.5                      |                         |                          | 534.7 (1.6)             | 3.9                      |                         |                          |                         |                          |                         |                          |                          |                          |
| C18-SiO <sub>2</sub><br>@Sm(PMo <sub>11</sub> ) <sub>2</sub> | 284.6 (1.2)             | 71.9                     | 402.0 (1.5)             | 100.0                    | 529.9 (1.7)             | 41.9                     | 102.0 (1.8)             | 64.2                     | 132.5 (2.0)             | 66.7                     | 230.8 (1.4)             | 10.4                     | 1082.7 (4.4)             | 60.0                     |
|                                                              | 285.8 (1.2)             | 17.4                     |                         |                          | 531.8 (1.7)             | 43.1                     | 104.6 (1.8)             | 2.5                      |                         |                          | 231.9 (1.4)             | 49.6                     | 1109.7 (4.4)             | 40.0                     |
|                                                              | 286.7 (1.2)             | 6.3                      |                         |                          | 534.0 (1.7)             | 8.6                      |                         |                          |                         |                          |                         |                          |                          |                          |
|                                                              | 287.8 (1.2)             | 4.4                      |                         |                          | 535.5 (1.7)             | 6.4                      |                         |                          |                         |                          |                         |                          |                          |                          |
| C18-SiO <sub>2</sub><br>@Eu(PMo <sub>11</sub> ) <sub>2</sub> | 284.6 (1.4)             | 57.9                     | 402.2 (1.6)             | 100.0                    | 530.2 (1.7)             | 39.7                     | 102.5 (1.9)             | 55.8                     | 133.1 (0.5)             | 66.7                     | 232.3 (1.5)             | 49.6                     | 136.9 <sup>e</sup> (3.4) | 60.0                     |
|                                                              | 286.0 (1.4)             | 27.3                     |                         |                          | 532.1 (1.7)             | 46.4                     | 104.8 (1.9)             | 10.8                     |                         |                          | 234.2 (1.5)             | 10.4                     | 142.5 <sup>e</sup> (3.4) | 40.0                     |
|                                                              | 287.1 (1.4)             | 12.2                     |                         |                          | 533.5 (1.7)             | 10.8                     |                         |                          |                         |                          |                         |                          | 1134.2 (5.2)             |                          |
|                                                              | 288.7 (1.4)             | 2.6                      |                         |                          | 534.9 (1.7)             | 3.1                      |                         |                          |                         |                          |                         |                          | 1163.5 (5.2)             |                          |

<sup>a</sup> The values between brackets refer to the full width at half-maximum (FWHM) of the bands. <sup>b</sup> Relative area of each component in the different core-level regions. <sup>c</sup> N 1s surface atomic percentage estimated through modulation, which includes the N 1s band and two sets of Mo 3p bands. <sup>d</sup> n.d. – not detected. <sup>e</sup> Surface atomic percentage estimated by curve fitting of the Eu 4d high-resolution spectrum.

**Table S2.** Core-level binding energy (BE) and area of each component for C18-SiO<sub>2</sub>@Gd(PMo<sub>11</sub>)<sub>2</sub>, C18-SiO<sub>2</sub>@Tb(PMo<sub>11</sub>)<sub>2</sub> and C18-SiO<sub>2</sub>@Dy(PMo<sub>11</sub>)<sub>2</sub> obtained by curve fitting of XPS spectra

| Material                                                     | C 1s                    |                          | N 1s <sup>c</sup>       |                          | O 1s                    |                          | Si 2p <sub>3/2</sub>    |                          | P 2p <sub>3/2</sub>     |                          | Mo 3d <sub>5/2</sub>    |                          | Ln <sup>III</sup> 3d/4d    |                          |
|--------------------------------------------------------------|-------------------------|--------------------------|-------------------------|--------------------------|-------------------------|--------------------------|-------------------------|--------------------------|-------------------------|--------------------------|-------------------------|--------------------------|----------------------------|--------------------------|
|                                                              | BE <sup>a</sup><br>(eV) | Area <sup>b</sup><br>(%) | BE <sup>a</sup><br>(eV)    | Area <sup>b</sup><br>(%) |
| C18-SiO <sub>2</sub><br>@Gd(PMo <sub>11</sub> ) <sub>2</sub> | 284.6 (1.3)             | 73.4                     | 402.0 (1.5)             | 100.0                    | 530.0 (1.6)             | 24.2                     | 102.4 (1.7)             | 64.7                     | 132.7 (1.8)             | 66.7                     | 230.8 (1.4)             | 17.1                     | 1188.3 <sup>d</sup> (5.0)  | 100.0                    |
|                                                              | 285.9 (1.3)             | 18.0                     |                         |                          | 532.0 (1.6)             | 65.0                     | 105.8 (1.7)             | 2.0                      |                         |                          | 232.1 (1.4)             | 42.9                     |                            |                          |
|                                                              | 286.8 (1.3)             | 5.4                      |                         |                          | 533.7 (1.6)             | 8.1                      |                         |                          |                         |                          |                         |                          |                            |                          |
|                                                              | 288.4 (1.3)             | 3.2                      |                         |                          | 535.7 (1.6)             | 2.7                      |                         |                          |                         |                          |                         |                          |                            |                          |
| C18-SiO <sub>2</sub><br>@Tb(PMo <sub>11</sub> ) <sub>2</sub> | 284.6 (1.3)             | 67.8                     | 402.0 (1.3)             | 100.0                    | 530.1 (1.6)             | 37.3                     | 102.4 (1.8)             | 64.7                     | 132.9 (2.2)             | 66.7                     | 231.1 (1.3)             | 15.3                     | 149.1 <sup>e</sup> (5.4)   | 3.6                      |
|                                                              | 285.9 (1.3)             | 19.4                     |                         |                          | 532.1 (1.6)             | 49.4                     | 104.6 (1.8)             | 1.9                      |                         |                          | 232.4 (1.3)             | 44.7                     | 1243.2 <sup>f</sup> (11.8) | n.d. <sup>g</sup>        |
|                                                              | 286.9 (1.3)             | 8.1                      |                         |                          | 534.2 (1.6)             | 8.6                      |                         |                          |                         |                          |                         |                          | 1277.2 <sup>f</sup> (11.8) | n.d. <sup>g</sup>        |
|                                                              | 288.2 (1.3)             | 4.7                      |                         |                          | 536.1 (1.6)             | 4.7                      |                         |                          |                         |                          |                         |                          |                            |                          |
| C18-SiO <sub>2</sub><br>@Dy(PMo <sub>11</sub> ) <sub>2</sub> | 284.6 (1.3)             | 69.5                     | 402.0 (1.4)             | 100.0                    | 529.9 (1.6)             | 23.6                     | 102.4 (1.7)             | 65.5                     | 132.9 (2.4)             | 66.7                     | 230.8 (1.5)             | 17.0                     | 1303.8 <sup>h</sup> (1.7)  | n.d. <sup>i</sup>        |
|                                                              | 285.9 (1.3)             | 19.1                     |                         |                          | 532.0 (1.6)             | 63.0                     | 105.4 (1.7)             | 1.2                      |                         |                          | 232.0 (1.5)             | 43.0                     |                            |                          |
|                                                              | 287.3 (1.3)             | 6.7                      |                         |                          | 534.0 (1.6)             | 7.3                      |                         |                          |                         |                          |                         |                          |                            |                          |
|                                                              | 288.5 (1.3)             | 4.7                      |                         |                          | 535.7 (1.6)             | 6.1                      |                         |                          |                         |                          |                         |                          |                            |                          |

<sup>a</sup> The values between brackets refer to the FWHM of the bands. <sup>b</sup> Relative area of each component in the different core-level regions. <sup>c</sup> N 1s surface atomic percentage estimated through modulation, which includes the N 1s band and two sets of Mo 3p bands. <sup>d</sup> BE of the Gd 3d<sub>5/2</sub> component; the second component (Gd 3d<sub>3/2</sub>) is overlapped with the carbon KLL Auger lines at ~1223 eV. <sup>e</sup> BE of the Tb 4d band used to estimate the Tb surface atomic percentage, since the RSF of Tb 3d is not reported in the literature or XPS libraries. <sup>f</sup> BEs of the Tb 3d components. <sup>g</sup> n.d. – not determined. <sup>h</sup> BE of the Dy 3d<sub>5/2</sub> component. <sup>i</sup> Dy 3d surface atomic percentage not calculated due to the lack of the RSF of Dy 3d.

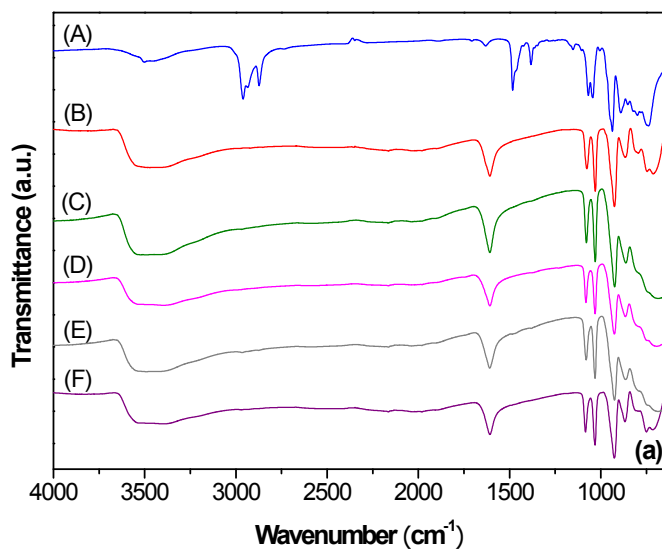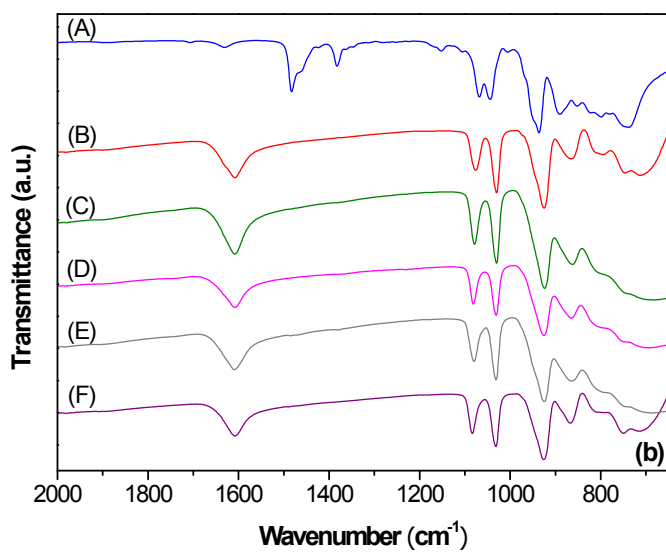

**Figure S1.** FTIR-ATR spectra of (A)  $\text{PMo}_{11}$ , (B)  $\text{Sm}(\text{PMo}_{11})_2$ , (C)  $\text{Eu}(\text{PMo}_{11})_2$ , (D)  $\text{Gd}(\text{PMo}_{11})_2$ , (E)  $\text{Tb}(\text{PMo}_{11})_2$  and (F)  $\text{Dy}(\text{PMo}_{11})_2$  in the (a) 4000–650  $\text{cm}^{-1}$  and (b) magnified 2000–650  $\text{cm}^{-1}$  ranges.

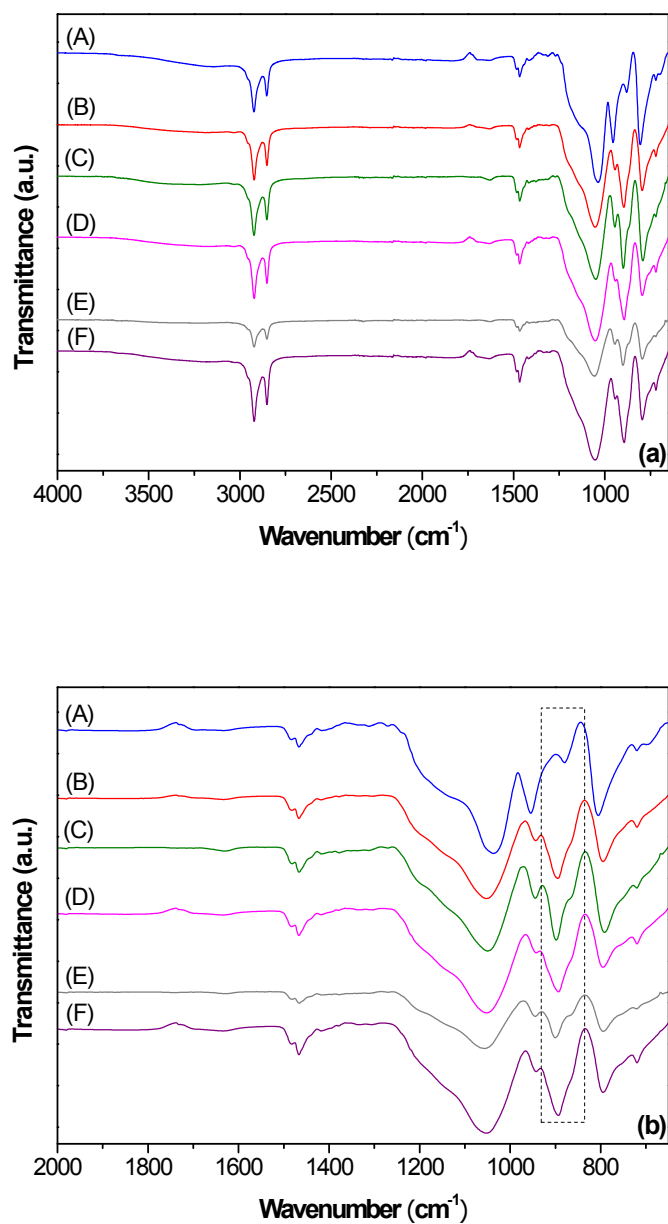

**Figure S2.** FTIR-ATR spectra of (A) C18-SiO<sub>2</sub>@PMo<sub>11</sub>, (B) C18-SiO<sub>2</sub>@Sm(PMo<sub>11</sub>)<sub>2</sub>, (C) C18-SiO<sub>2</sub>@Eu(PMo<sub>11</sub>)<sub>2</sub>, (D) C18-SiO<sub>2</sub>@Gd(PMo<sub>11</sub>)<sub>2</sub>, (E) C18-SiO<sub>2</sub>@Tb(PMo<sub>11</sub>)<sub>2</sub> and (F) C18-SiO<sub>2</sub>@Dy(PMo<sub>11</sub>)<sub>2</sub> in the (a) 4000–650 cm<sup>-1</sup> and (b) magnified 2000–650 cm<sup>-1</sup> ranges. Dashed rectangle: characteristic vibrational bands of the lanthano phosphomolybdates.

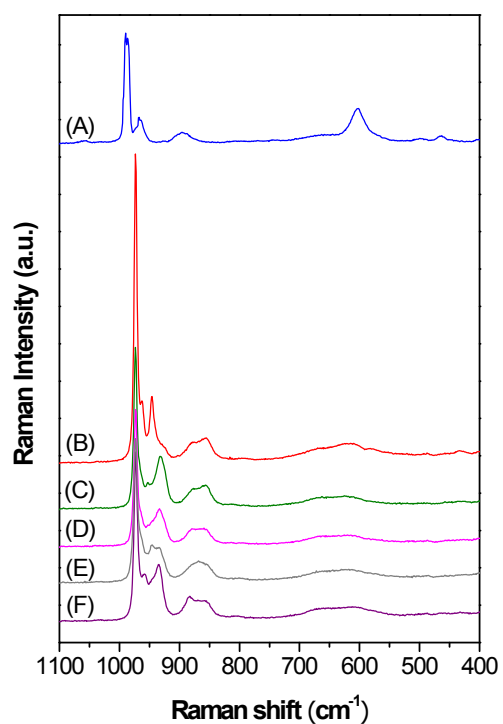

**Figure S3.** Raman spectra of (A)  $\text{PMo}_{11}$ , (B)  $\text{Sm}(\text{PMo}_{11})_2$ , (C)  $\text{Eu}(\text{PMo}_{11})_2$ , (D)  $\text{Gd}(\text{PMo}_{11})_2$ , (E)  $\text{Tb}(\text{PMo}_{11})_2$  and (F)  $\text{Dy}(\text{PMo}_{11})_2$  in the 1100–400  $\text{cm}^{-1}$  range.

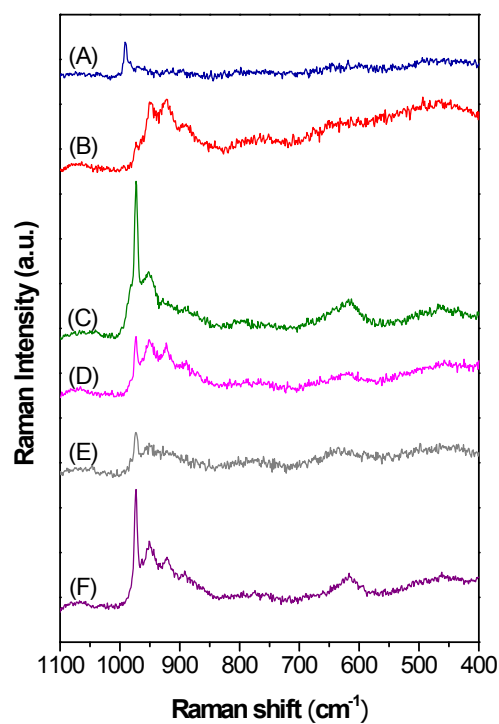

**Figure S4.** Raman spectra of (A) C18-SiO<sub>2</sub>@PMo<sub>11</sub>, (B) C18-SiO<sub>2</sub>@Sm(PMo<sub>11</sub>)<sub>2</sub>, (C) C18-SiO<sub>2</sub>@Eu(PMo<sub>11</sub>)<sub>2</sub>, (D) C18-SiO<sub>2</sub>@Gd(PMo<sub>11</sub>)<sub>2</sub>, (E) C18-SiO<sub>2</sub>@Tb(PMo<sub>11</sub>)<sub>2</sub> and (F) C18-SiO<sub>2</sub>@Dy(PMo<sub>11</sub>)<sub>2</sub> in the 1100–400 cm<sup>-1</sup> range.

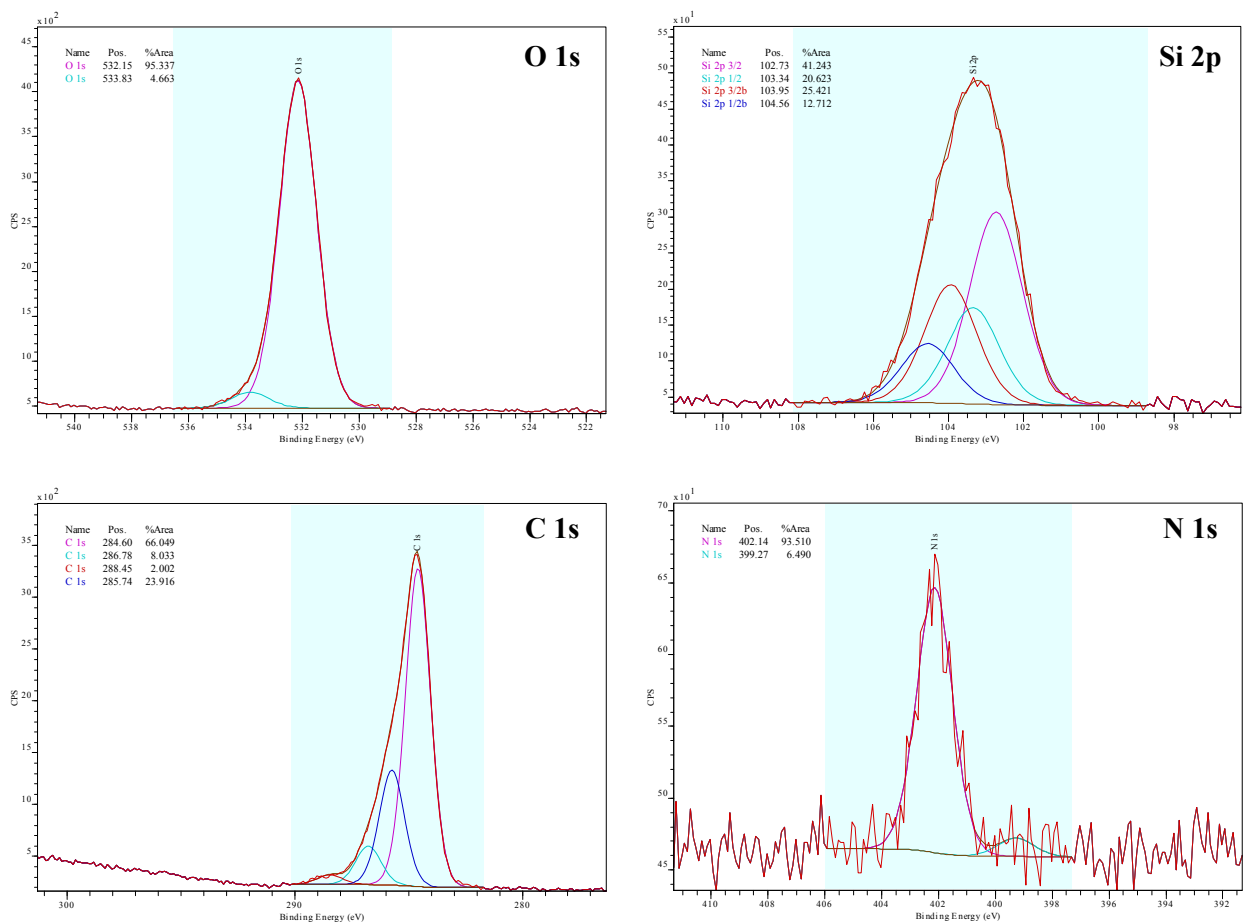

**Figure S5.** Deconvoluted XPS high-resolution spectra of C18-SiO<sub>2</sub> in the O 1s, Si 2p, C 1s and N 1s core-level regions. The overall simulated spectra are represented by brown lines.



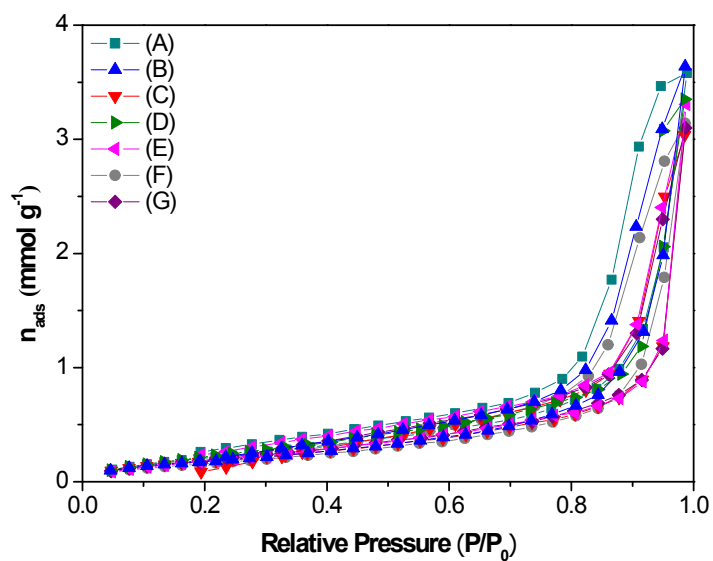

**Figure S6.**  $N_2$  adsorption-desorption isotherms at  $-196\text{ }^\circ\text{C}$  of (A) C18-SiO<sub>2</sub>, (B) C18-SiO<sub>2</sub>@PMo<sub>11</sub>, (C) C18-SiO<sub>2</sub>@Sm(PMo<sub>11</sub>)<sub>2</sub>, (D) C18-SiO<sub>2</sub>@Eu(PMo<sub>11</sub>)<sub>2</sub>, (E) C18-SiO<sub>2</sub>@Gd(PMo<sub>11</sub>)<sub>2</sub>, (F) C18-SiO<sub>2</sub>@Tb(PMo<sub>11</sub>)<sub>2</sub> and (G) C18-SiO<sub>2</sub>@Dy(PMo<sub>11</sub>)<sub>2</sub>.
